# Supplementary material for: Adsorption and anion exchange insight of indigo carmine onto CuAl-LDH/SWCNTs nanocomposite: kinetic, thermodynamic and isotherm analysis
Source: Royal Society of Chemistry journal article supplement (doi:10.1039/c8ra09562k), 2019-01-01
Supplement: c8ra09562k1.pdf [file c8ra09562k1.pdf]

**Adsorption and anion exchange insight of indigo carmine onto CuAl-LDH/SWCNTs  
nanocomposite: kinetic, thermodynamic and isotherm analysis**

Noha Almoisheer,<sup>a</sup> F.A. Alseroury,<sup>a,b</sup> Rajeev Kumar,<sup>c</sup> M. Aslam,<sup>d</sup> M.A.

Barakat<sup>c,e\*</sup>

<sup>a</sup>Department of Physics, Faculty of Science, King Abdulaziz University, KSA

<sup>b</sup>Department of Physics, Faculty of Science, University of Jeddah, KSA

<sup>c</sup>Department of Environmental Sciences, Faculty of Meteorology, Environment  
and Arid Land Agriculture, King Abdulaziz University, Jeddah, 21589, KSA

<sup>d</sup>Center of Excellence in Environmental Studies, King Abdulaziz University, KSA

<sup>e</sup>Central Metallurgical R & D Institute, Helwan 11421, Cairo, Egypt

\*Corresponding Author's Email: [mabarakat@gmail.com](mailto:mabarakat@gmail.com)

Phone: +96626400000, ex. 64821

Fax : +96626952364

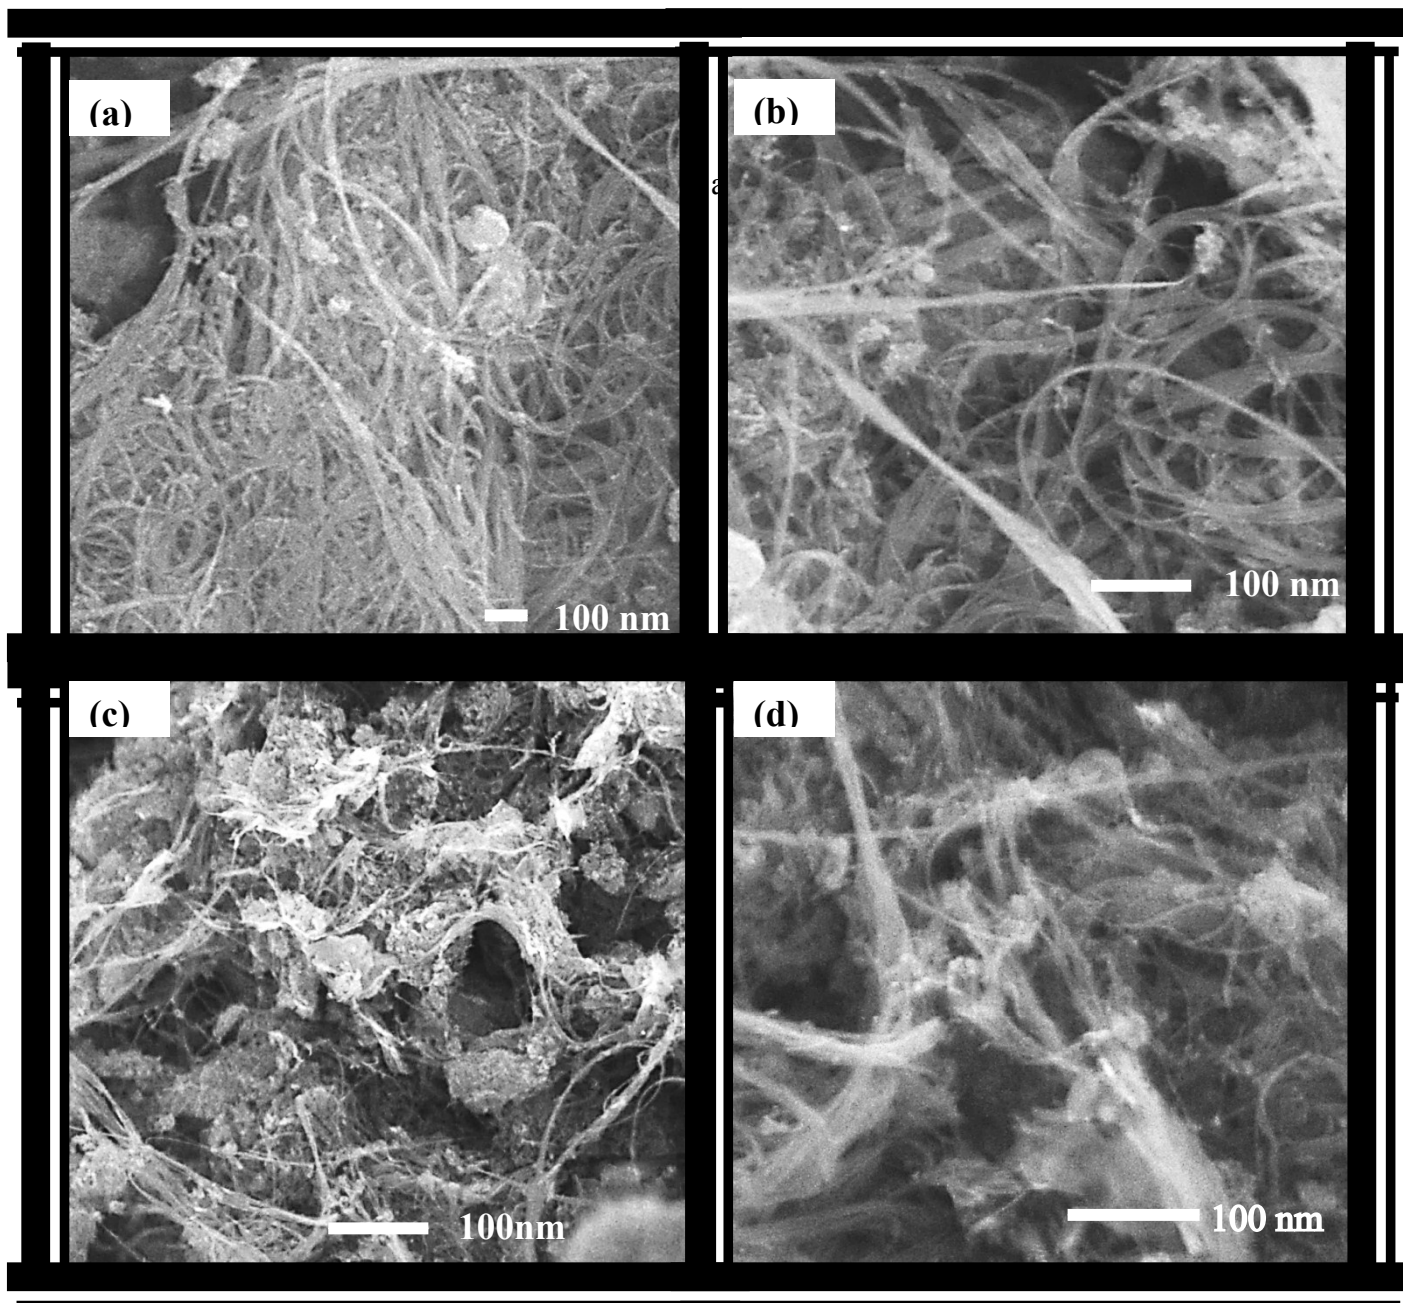

**Fig. S1. SEM Images of (a,b SWCNTS) and (c, d) CuAl-LDH/SWCNTs nanocomposite**

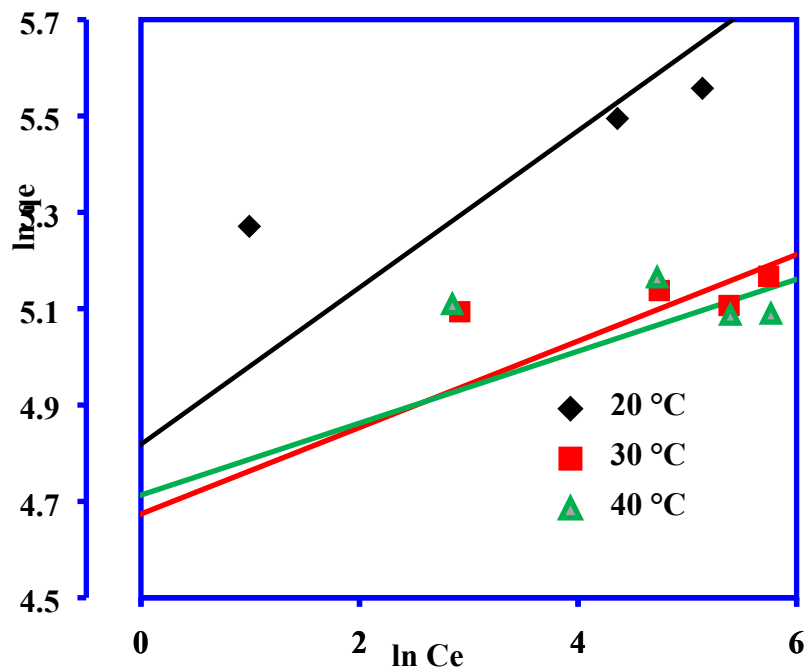

Fig. S2. Freundlich isotherm plot for adsorption of IC onto CuAl-DLH/SWCNTs nanocomposite

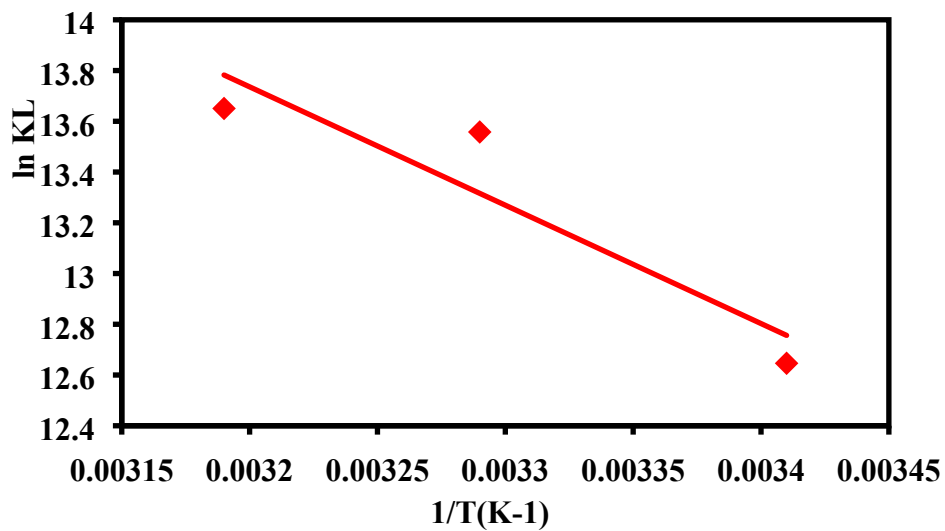

Fig. S3. Van't Hoff plot for the adsorption of IC onto CuAl-DLH/SWCNTs nanocomposite

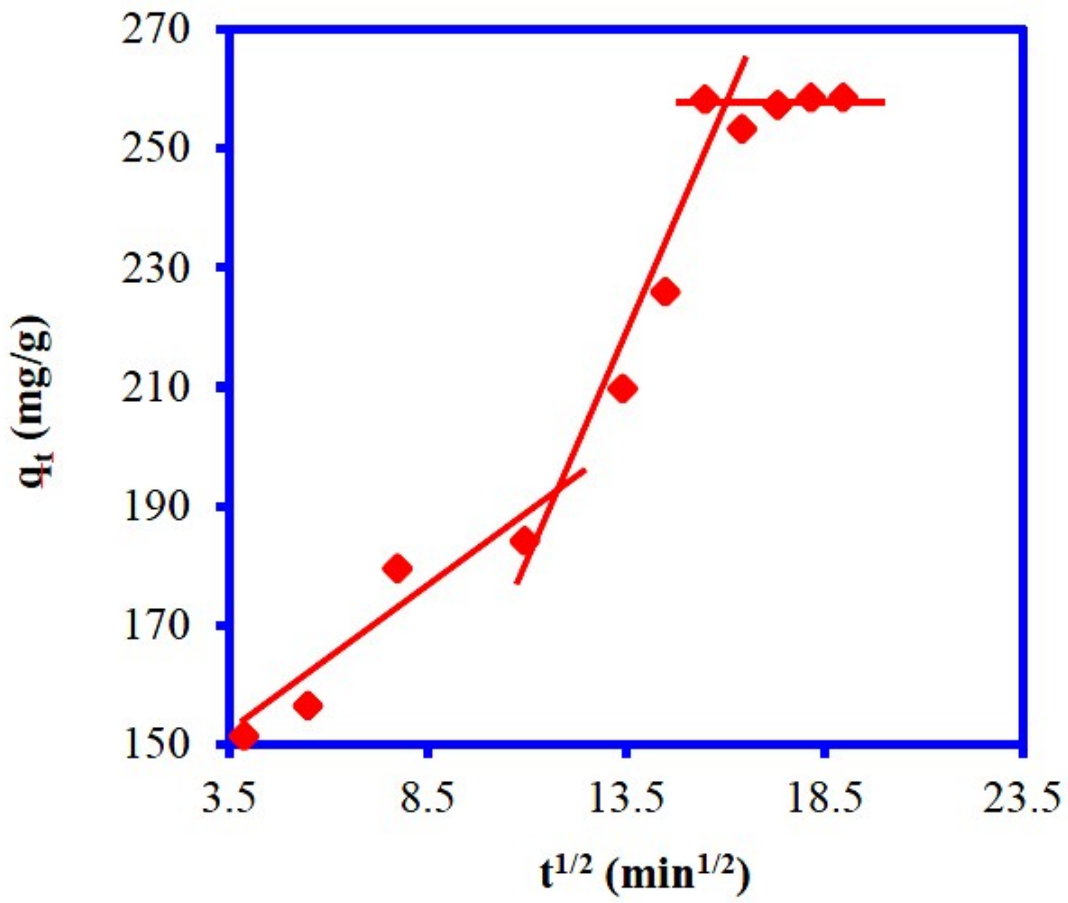

**Fig. S4.** Weber-Morris intraparticle diffusion for IC adsorption on to CuAl-DLH/SWCNTs nanocomposite
